# Supplementary material
Source: publisher figshare collection journal article supplement (https://acs.figshare.com/ndownloader/files/4400392)
Supplement: Supplementary file 1 [file 4400392]

# Cell Adhesion Properties on Chemically Micropatterned Boron-Doped Diamond Surfaces

Lionel Marcon,<sup>\*,†,‡</sup> Corentin Spriet,<sup>†</sup> Yannick Coffinier,<sup>†,‡</sup> Elisabeth Galopin,<sup>†,‡</sup> Claire Rosnoblet,<sup>†</sup> Sabine Szunerits,<sup>†,‡</sup>  
Laurent Hélot,<sup>†</sup> Pierre-Olivier Angrand,<sup>†</sup> and Rabah Boukherroub<sup>†,‡</sup>

<sup>†</sup>Interdisciplinary Research Institute (IRI), USR-CNRS 3078, Université de Lille 1, Parc de la Haute Borne, 50 avenue de Halley, 59658 Villeneuve d'Ascq, <sup>‡</sup>Institute of Electronics, Microelectronics and Nanotechnology (IEMN), UMR-CNRS 8520, Université de Lille 1, Cité Scientifique, 59655 Villeneuve d'Ascq, France.

<sup>\*</sup>To whom correspondence should be addressed. E-mail: [Lionel.Marcon@iri.univ-lille1.fr](mailto:Lionel.Marcon@iri.univ-lille1.fr). Telephone : +33 (0)3 62 53 17 23. Fax: +33 (0)3 62 53 17 01

## Supporting Information

### XPS spectra of the functionalized BDD surfaces

For more details on the spectra analysis, see the references <sup>1,2</sup> from our previous works.

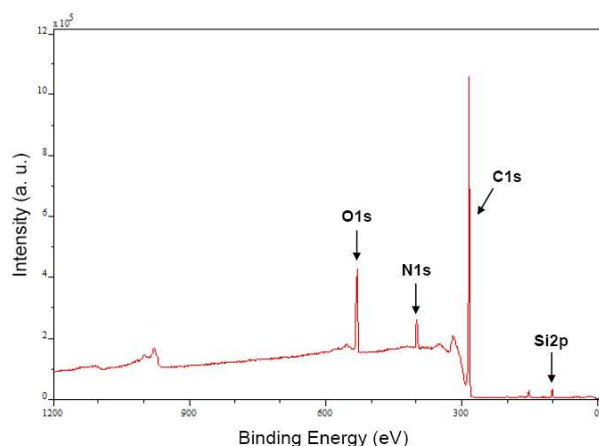

**Figure S1.** XPS survey of plasma aminated BDD.

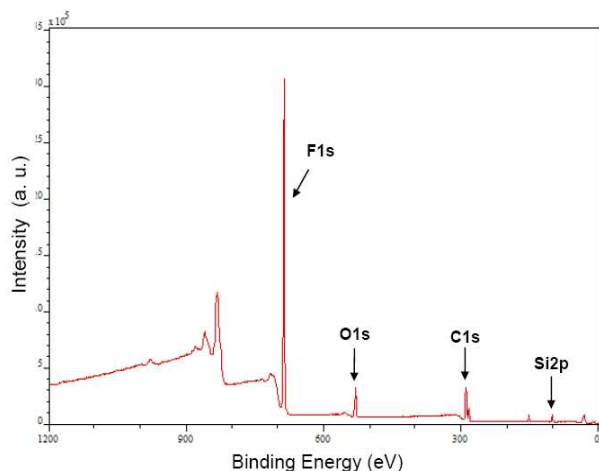

**Figure S2.** XPS survey of oxidized BDD after chemical reaction with perfluorotrichlorosilanes.

## Time-lapse cell imaging

We assessed the cell proliferation kinetics of fluorescent U2OS cells on chemically-modified BDD substrates using a time-lapse observation. Cells were incubated at 37°C and 5% CO<sub>2</sub>. Phase contrast images and fluorescent images were acquired using a YFP HYQ filter set (Nikon) every hour for 40 h. Image analysis was done using NIS-Elements AR software (Nikon).

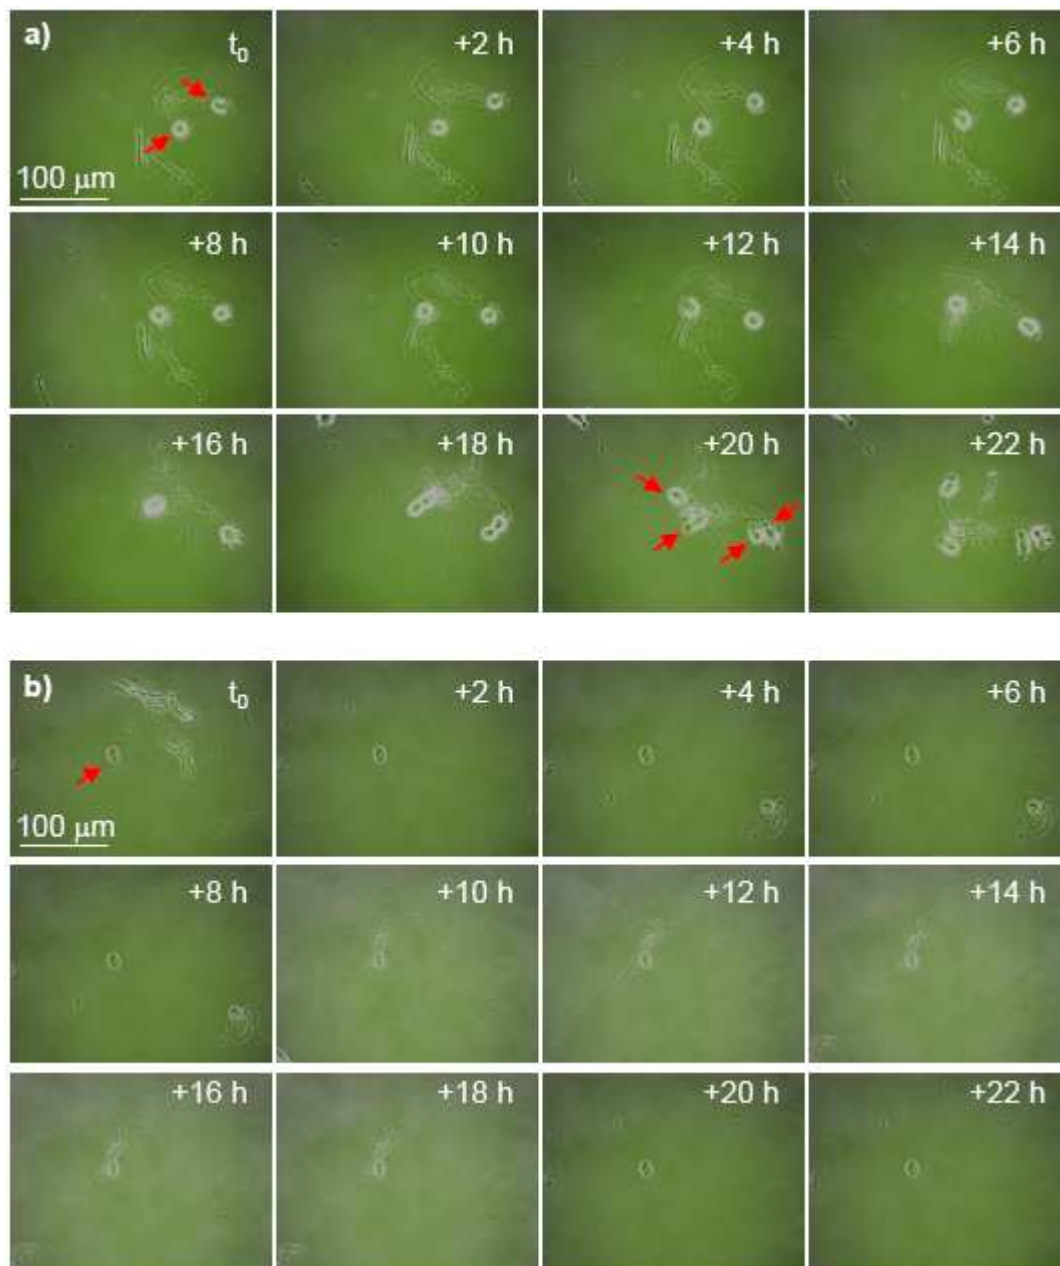

**Figure S3.** Time-lapse cell imaging of U2OS cells on a) a culture dish and b) a  $-(CH_2)_{17}-CH_3$  terminated BDD. Cells are indicated with a red arrow.

## Incubation of various densities of L929 cells on patterned BDD surfaces

L929 cells were plated at the indicated density on the modified surfaces bearing the 400  $\mu m^2$  patterns. Surfaces were subsequently observed by fluorescence microscopy every 2 hours until cells grew to ~ 80% confluence.

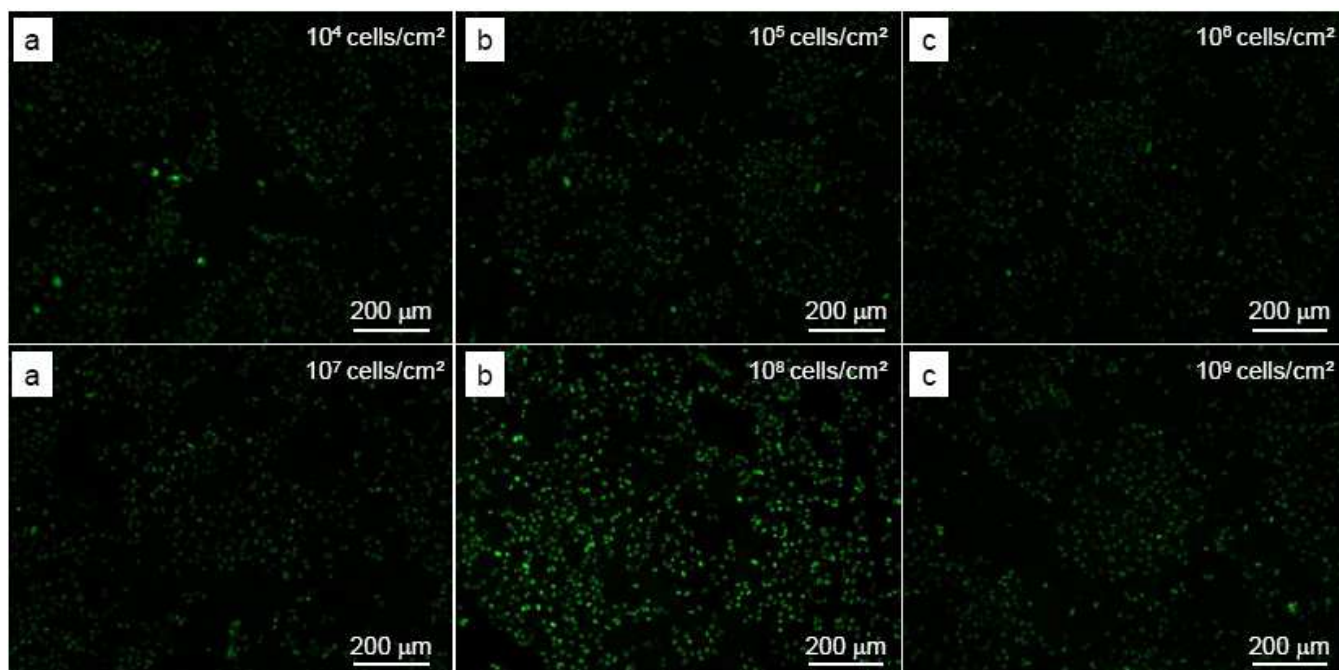

**Figure S4.** Impact of the L929 cell density on the colonization of 400  $\mu\text{m}^2$ -patterned BDD surfaces.

#### References.

- (1) Boukherroub, R.; Wallart, X.; Szunerits, S.; Marcus, B.; Bouvier, P.; Mermoux, M. *Electrochem. Commun.* **2005**, 7, 937-940.
- (2) Szunerits, S.; Jama, C.; Coffinier, Y.; Marcus, B.; Delabouglise, D.; Boukherroub, R. *Electrochem. Commun.* **2006**, 8, 1185-1190.
